# Supplementary material for: Tapping the potential of a glucosamine polysaccharide-diatomaceous earth hybrid adsorbent in the solid phase extraction of a persistent organic pollutant and toxic pesticide 4,4′-DDT from water
Source: Royal Society of Chemistry journal article supplement (doi:10.1039/d1ra07868b), 2022-01-01
Supplement: d1ra07868b1.pdf [file d1ra07868b1.pdf]

## Supplementary information

### **Tapping the potential of a Glucosamine Polysaccharide-Diatomaceous Earth hybrid adsorbent in the solid phase extraction of a persistent organic pollutant and toxic pesticide 4,4'-DDT from Water**

Jagadeesh Kodali<sup>1,2</sup>, Pavuluri Srinivas<sup>2</sup>, Balasubramanian Arunraj<sup>1</sup>, A. Santhana Krishna Kumar<sup>3</sup> and N. Rajesh<sup>1\*</sup>

<sup>1</sup>*Department of Chemistry, Birla Institute of Technology and Science, Pilani-Hyderabad Campus, Jawahar Nagar, Shameerpet Mandal, R.R. Dist 500 078, India*

<sup>2</sup>*VIMTA Labs Limited, No.5, MN Park, Genome Valley, Shameerpet, Hyderabad 500101, India*

<sup>3</sup>*Department of Chemistry, National Sun Yat-sen University, No 70, Lien-hai Road, Gushan District, Kaohsiung 80424, Taiwan.*

*\*Corresponding author. Tel.: +91 40 66303503. Fax: +91 40 66303998*

*E-mail: [nrajesh@hyderabad.bits-pilani.ac.in](mailto:nrajesh@hyderabad.bits-pilani.ac.in)*

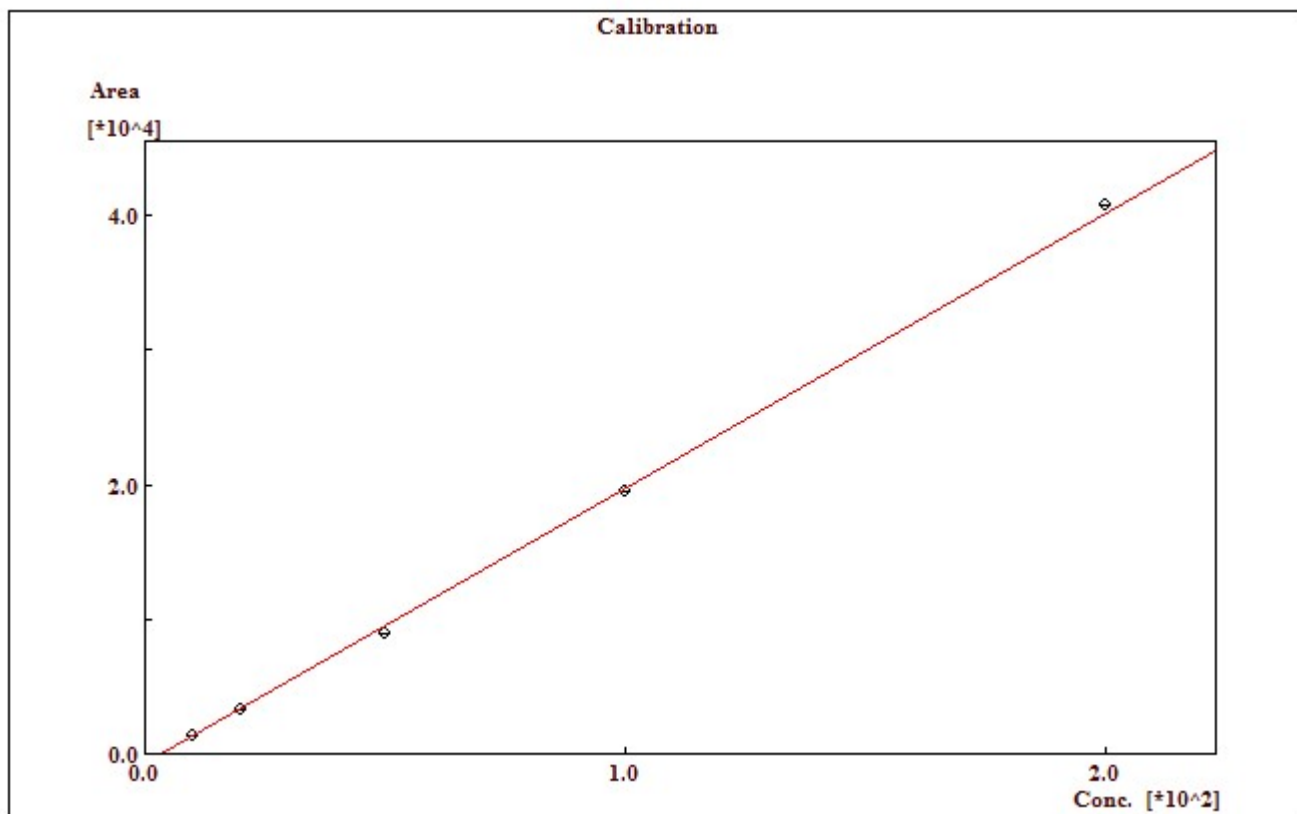

**Fig S1(a).** Calibration curve for 4,4'-DDT

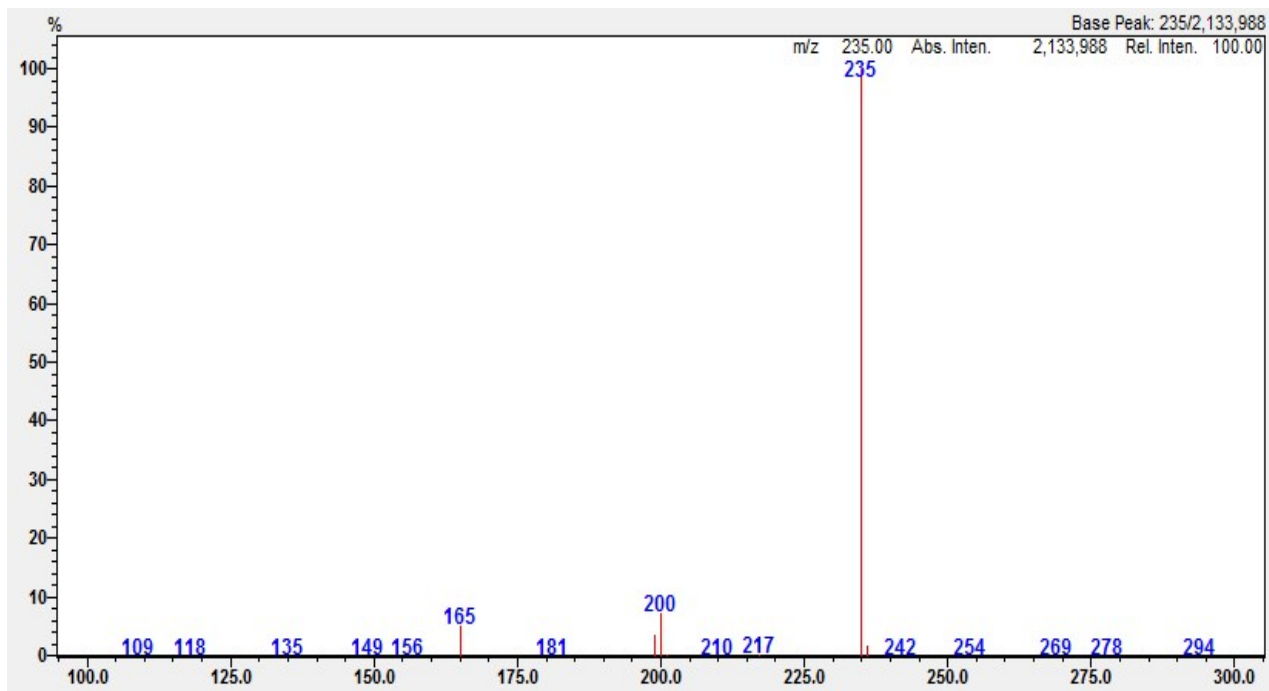

**Fig S1(b).** Precursor ion scan of 4,4'-DDT (m/z 235)

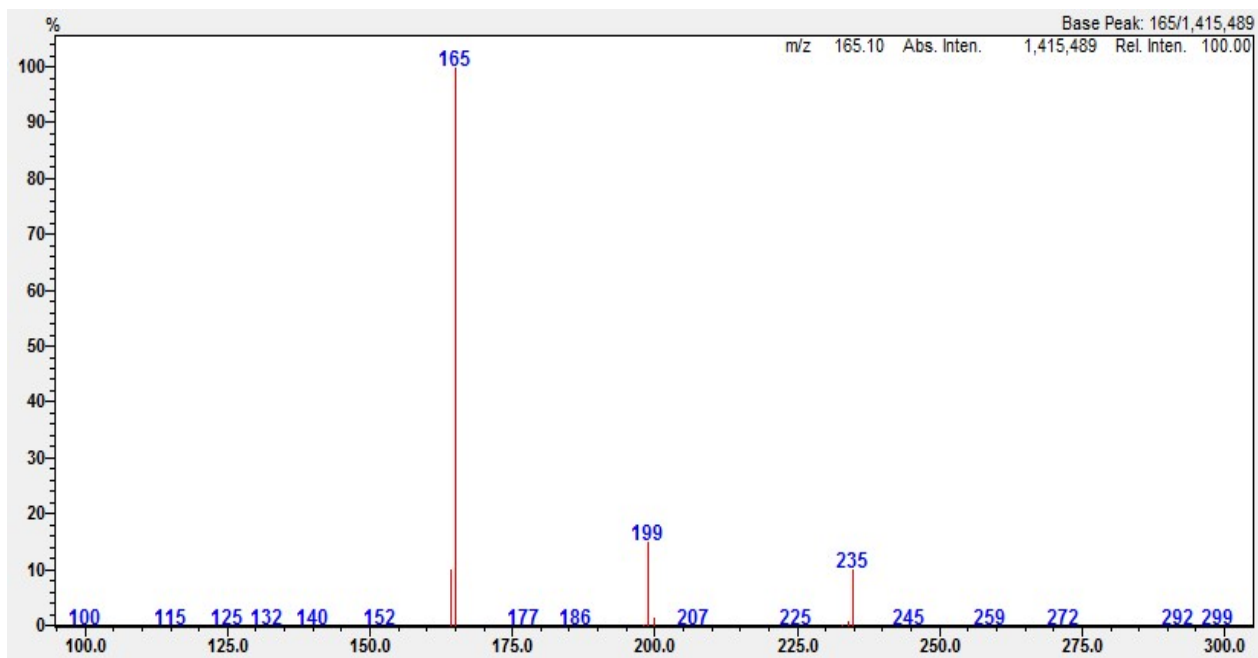

**Fig S1(c).** Product ion spectra of 4,4'-DDT (m/z 165, m/z 199)

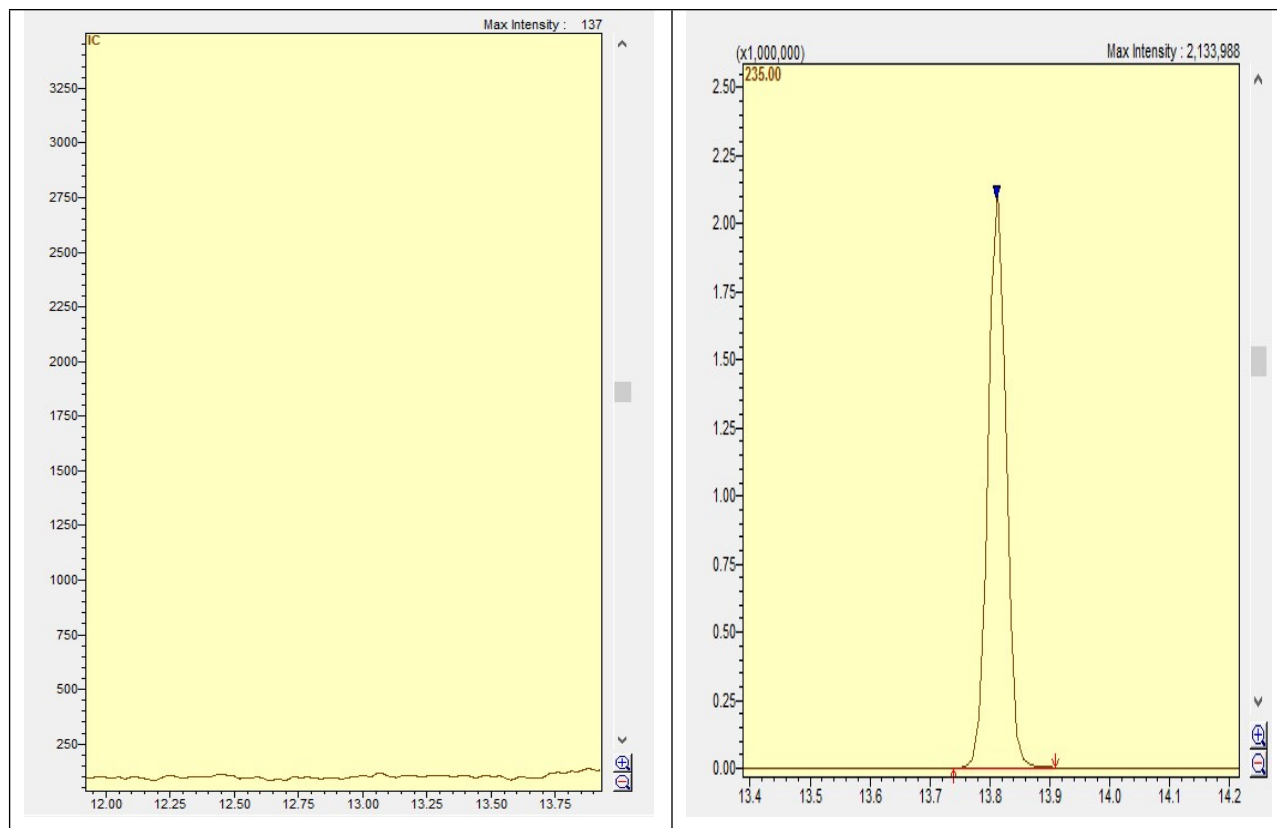

**Fig S1(d).**(left) Blank and (right) 4,4'-DDT peak

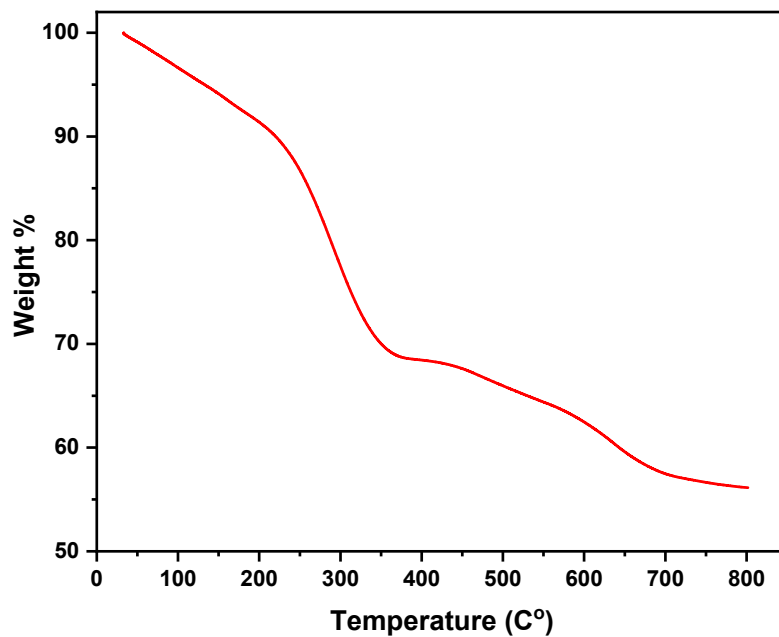

**Fig S2.** TGA profile of adsorbent Chitosan Diatomaceous earth composite

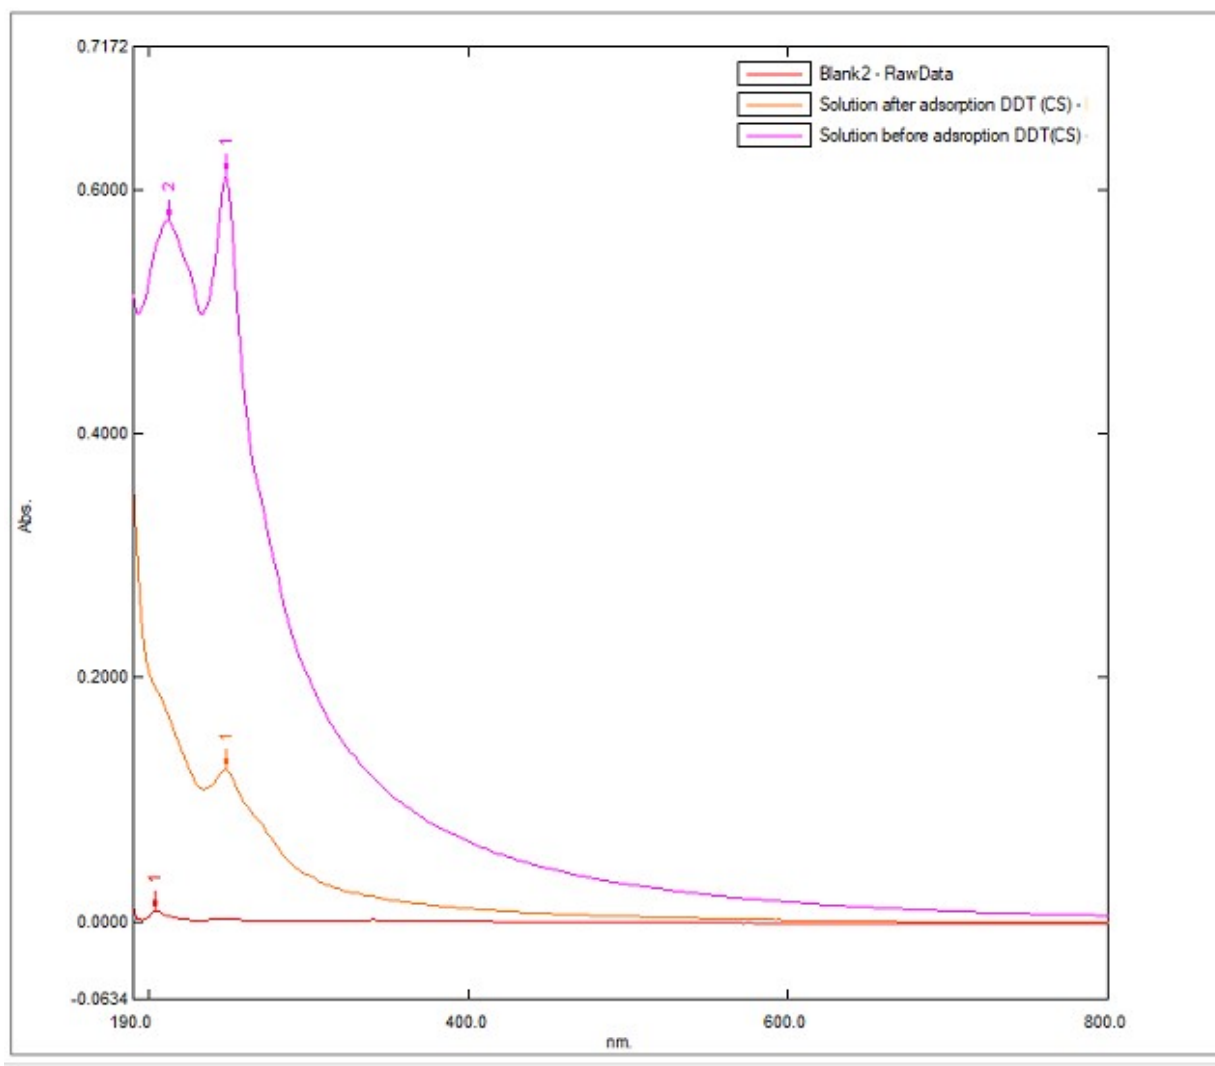

**Fig S3.** UV spectra of solution before and after desorption of 4,4'-DDT

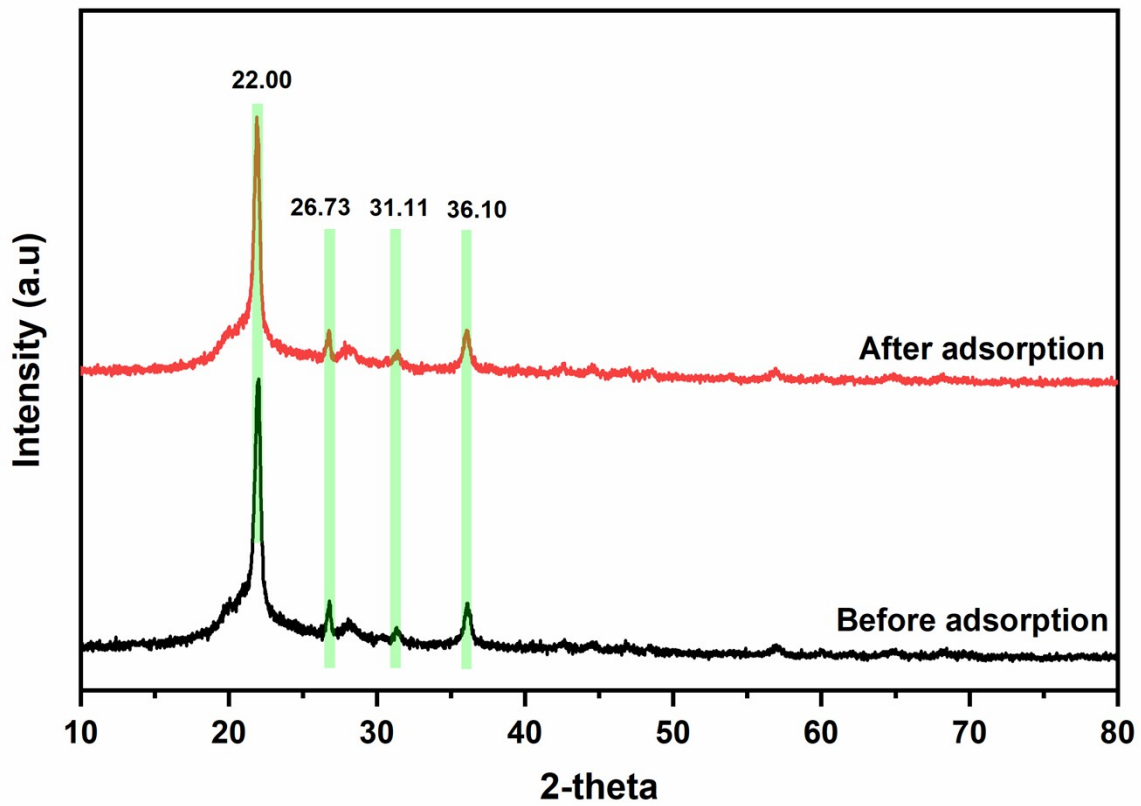

**Fig S4.** XRD pattern of Chitosan-Diatomaceous earth hybrid before and after adsorption of 4,4'-DDT.

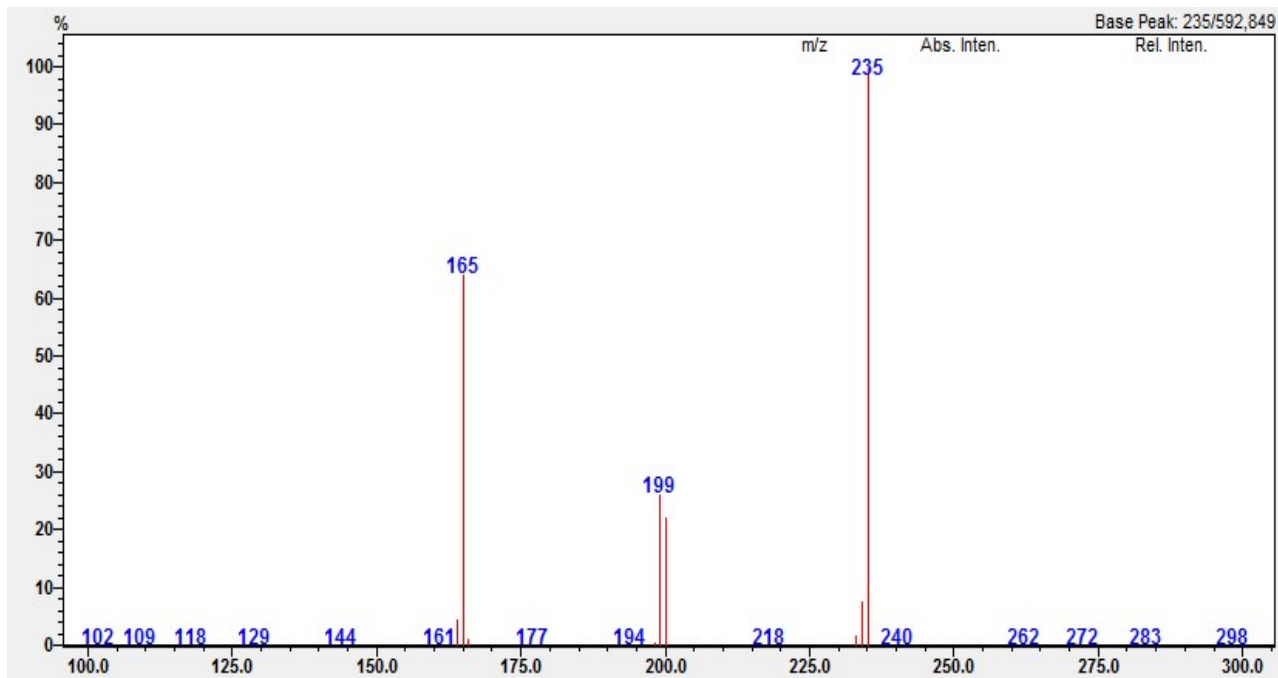

**Fig S5.** MS spectra of 4,4'-DDT showing distinct precursor and product ions after desorption





**Table S1:** Regeneration studies of Chitosan-Diatomaceous earth hybrid

| Volume of water(L) | Weight of sorbent (g) | Cycle     | 4,4'-DDT Spiking concentration, mg L <sup>-1</sup> | Equilibrium Conc. mg L <sup>-1</sup> | Adsorbed Conc. mg L <sup>-1</sup> | % Adsorption |
|--------------------|-----------------------|-----------|----------------------------------------------------|--------------------------------------|-----------------------------------|--------------|
| 0.1                | 0.2                   | 1st cycle | 0.1                                                | 0.0026<br>±0.0006                    | 0.0974<br>±0.0006                 | 97.4 ± 0.6   |
| 0.1                | 0.2                   | 2nd cycle | 0.1                                                | 0.0048<br>±0.0011                    | 0.0952<br>±0.0011                 | 95.2 ± 0.5   |
| 0.1                | 0.2                   | 3rd cycle | 0.1                                                | 0.0087<br>±0.0014                    | 0.0913<br>±0.0014                 | 91.3 ± 0.6   |

**Table S2:** Adsorption efficacy of 4, 4'-DDT in the presence of competing pesticides (0.1 mg L<sup>-1</sup> level)

| Volume of water (L) | Weight of sorbent (g) | Competing pesticides spiking concentration # | 4,4'-DDT Spiking concentration, mg L <sup>-1</sup> | Conc. at equilibrium, mg L <sup>-1</sup> | Adsorbed conc. mg L <sup>-1</sup> | % Adsorption |
|---------------------|-----------------------|----------------------------------------------|----------------------------------------------------|------------------------------------------|-----------------------------------|--------------|
|                     |                       |                                              | C <sub>o</sub>                                     | C <sub>e</sub>                           | C <sub>o</sub> -C <sub>e</sub>    |              |
| 0.1                 | 0.2                   | 0.1 mg L <sup>-1</sup> each                  | 0.1                                                | 0.0035±0.0007                            | 0.09647±0.0007                    | 96.5±0.65    |

# Competing pesticides: alpha-HCH, beta-HCH, gamma-HCH, Endosulfan-I, Endosulfan-II

**Table S3:** Adsorption efficiency of Chitosan-Diatomaceous earth hybrid in farm run-off water

| Volume of agri run-off water (L) | Weight of sorbent (g) | 4,4'-DDT Spiking concentration, mg L <sup>-1</sup> | Conc. at equilibrium, mg L <sup>-1</sup> | Adsorbed conc. mg L <sup>-1</sup> | % Adsorption |
|----------------------------------|-----------------------|----------------------------------------------------|------------------------------------------|-----------------------------------|--------------|
|                                  |                       | C <sub>o</sub>                                     | C <sub>e</sub>                           | C <sub>o</sub> -C <sub>e</sub>    |              |
| 0.1                              | 0.2                   | 0.1                                                | 0.0094±0.0012                            | 0.09057±0.0012                    | 90.6±1.2     |
